# Supplementary material for: A FRET system built on quartz plate as a ratiometric fluorescence sensor for mercury ions in water
Source: Royal Society of Chemistry journal article supplement (doi:10.1039/c2an16231h), 2012-01-01
Supplement: c2an16231h.pdf [file c2an16231h.pdf]

## **Electronic Supplementary Information**

### **A FRET System Built on Quartz Plate as a Ratiometric Fluorescence Sensor for Mercury Ions in Water**

Baoyu Liu, Fang Zeng,\* Yan Liu and Shuizhu Wu\*

## 1. Schemes for synthetic routes:

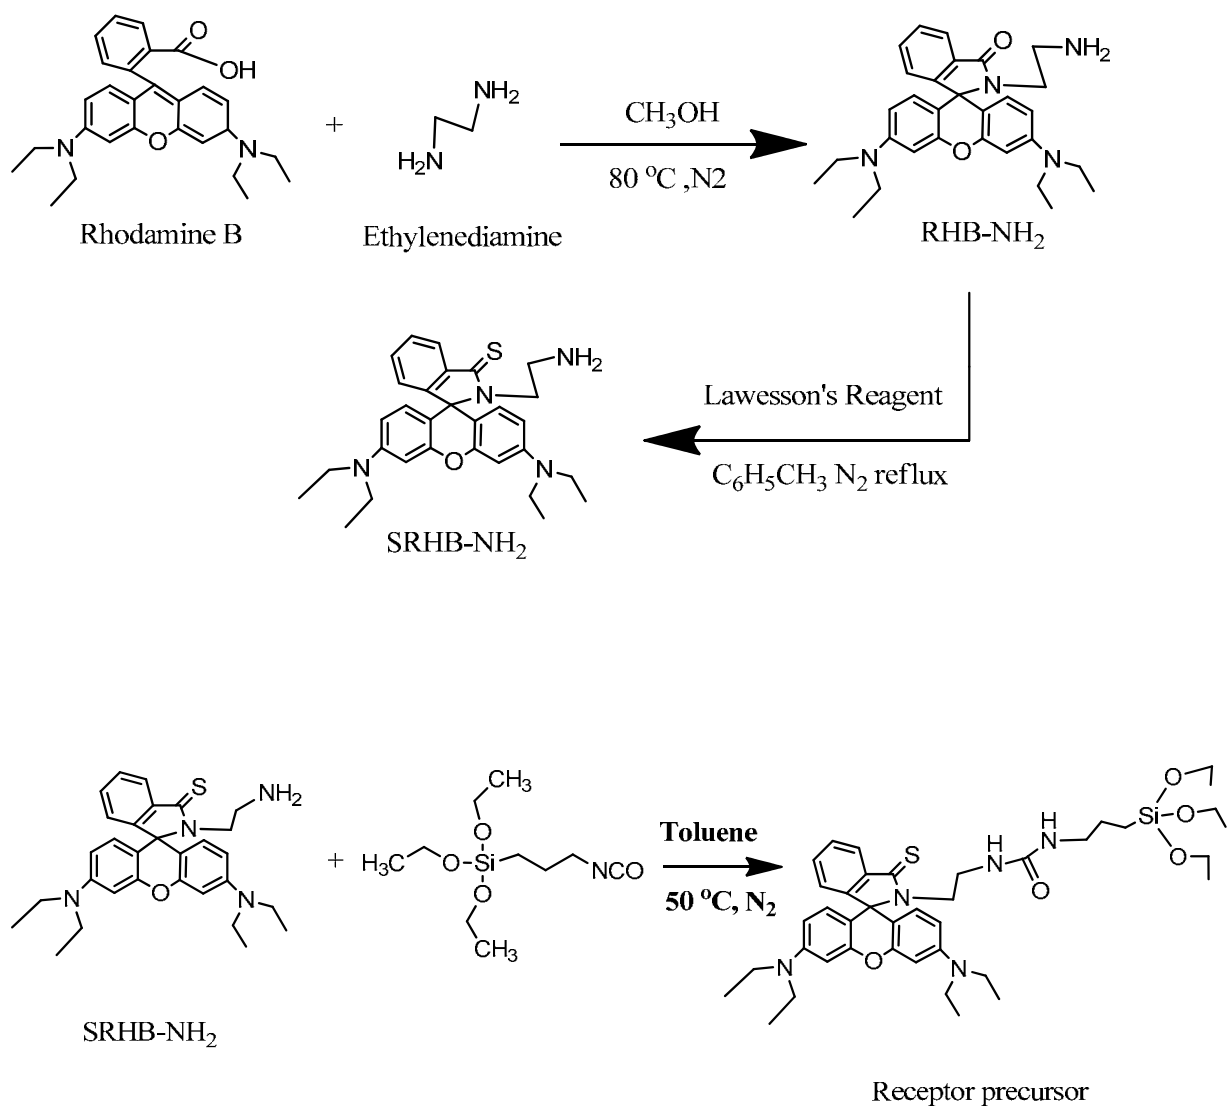

**Scheme S1.** Synthetic route of the  $\text{Hg}^{2+}$  receptor (SRhB- $\text{NH}_2$ ) and ethoxysilane-linked receptor (SRHB-APS, the receptor precursor).

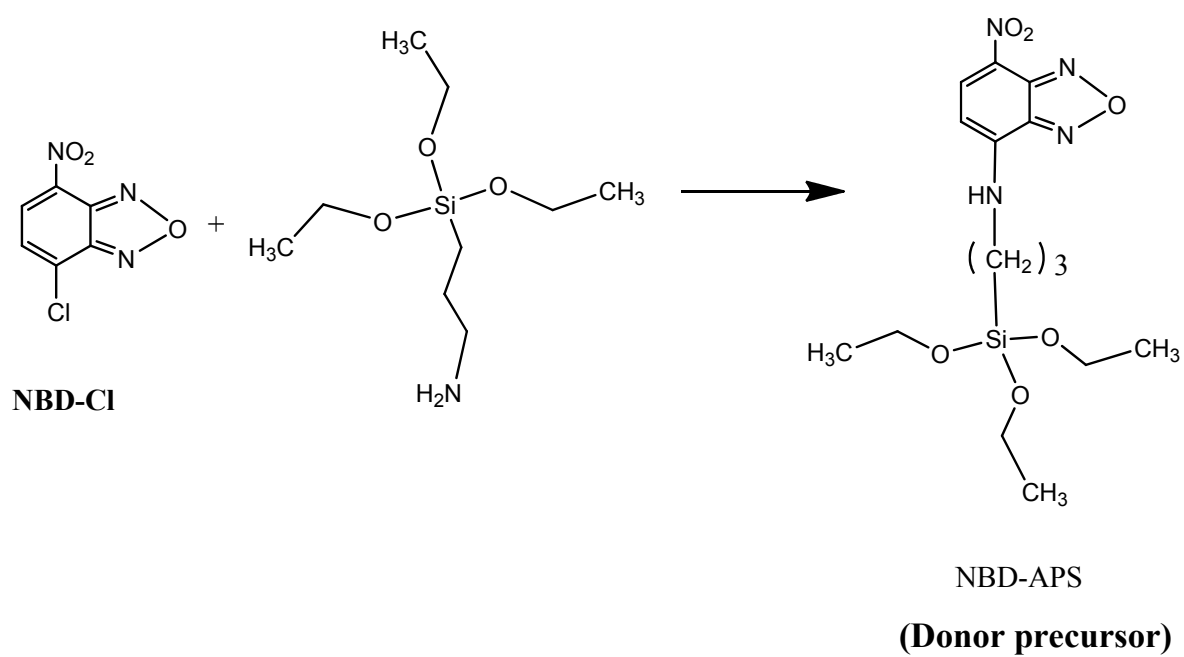

**Scheme S2.** Synthetic route of ethoxysilane-linked donor (donor precursor, NBD-APS)

## 2. Characterizations

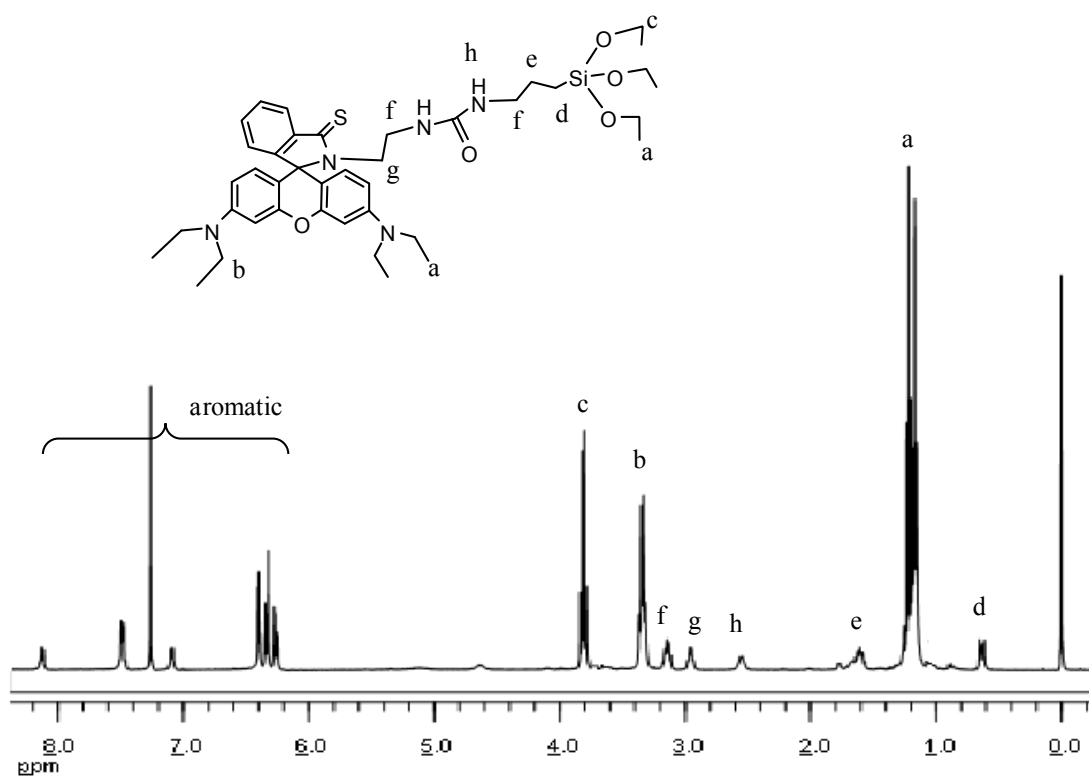

(a)

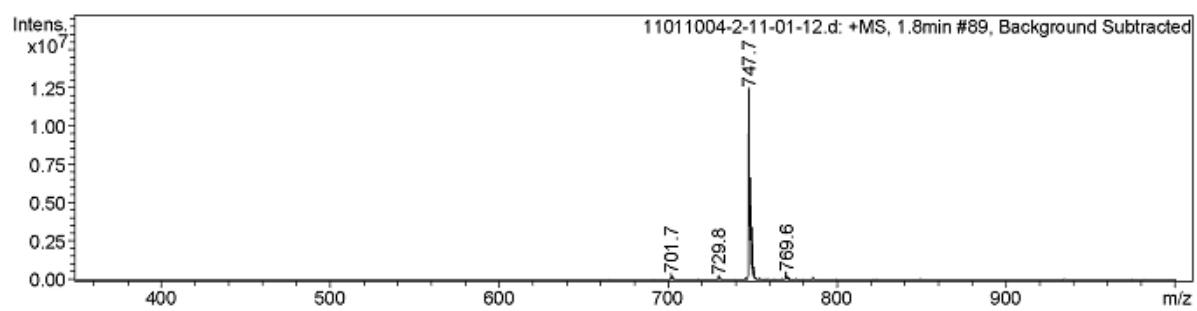

(b)

**Fig. S1.** <sup>1</sup>H NMR and MS spectra for probe precursor.

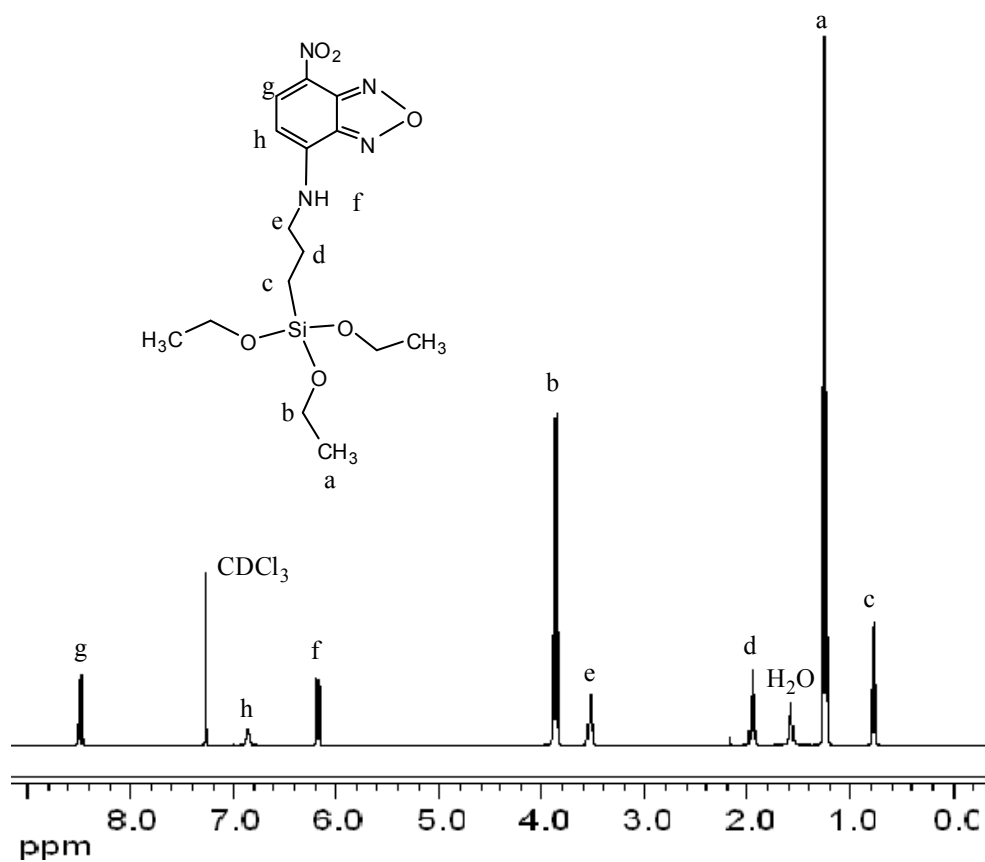

(a)

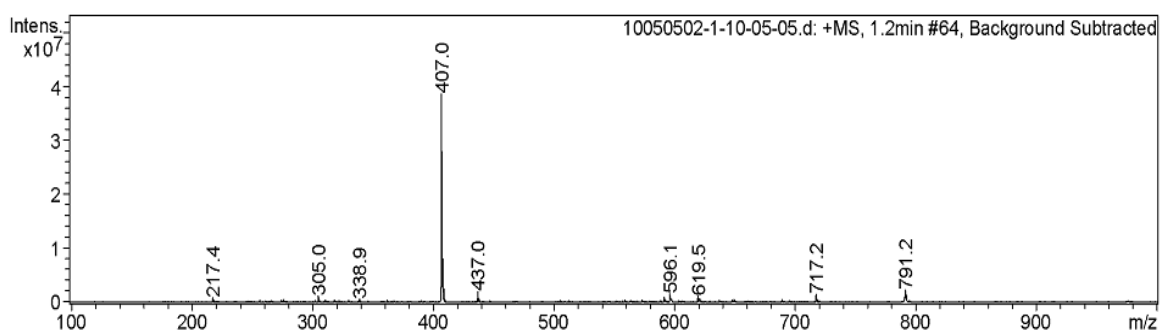

(b)

**Fig. S2.** <sup>1</sup>H NMR (a) and MS spectrum (b) for donor precursor.

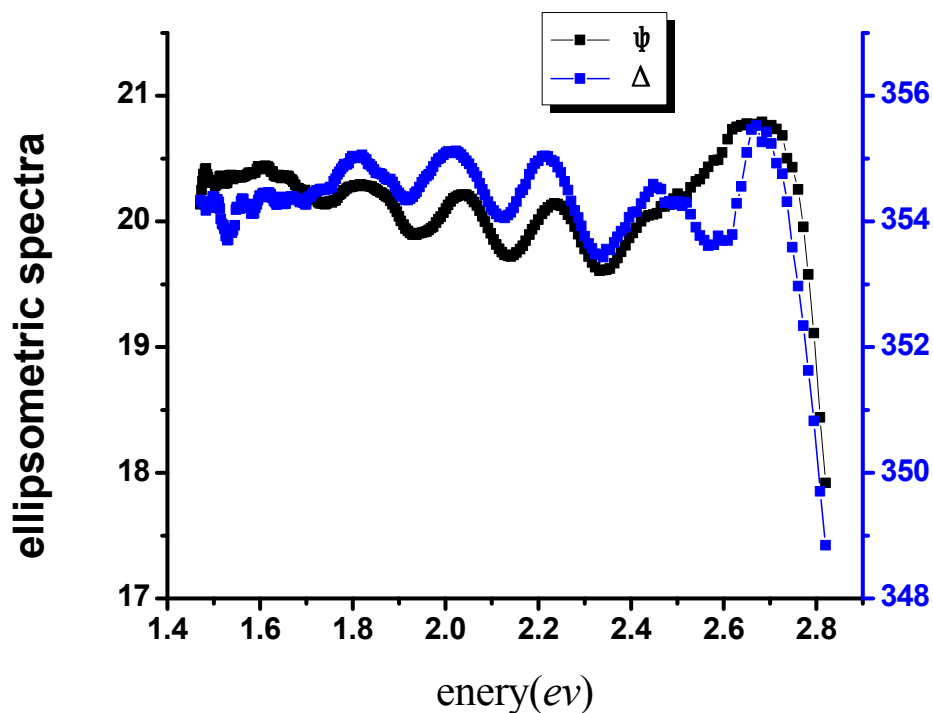

**Fig. S3.** Plot of ellipsometric parameters  $\Psi$  (amplitude ratio) and  $\Delta$  (phase difference) as the function of photon energy (in eV) for the multilayered film (before deposition of receptor layer).

**Table S1.** Determined thickness for the multilayered film as a result of fitting.

| Layer   | Thickness (nm) | Standard deviation |
|---------|----------------|--------------------|
| Support | 116.5          | $\pm 9.3$          |
| Donor   | 0.90           | $\pm 0.18$         |
| Spacer  | 2.8            | $\pm 0.8$          |

Note: To simplify the data analysis, we used sample with no receptor layer for thickness evaluation.

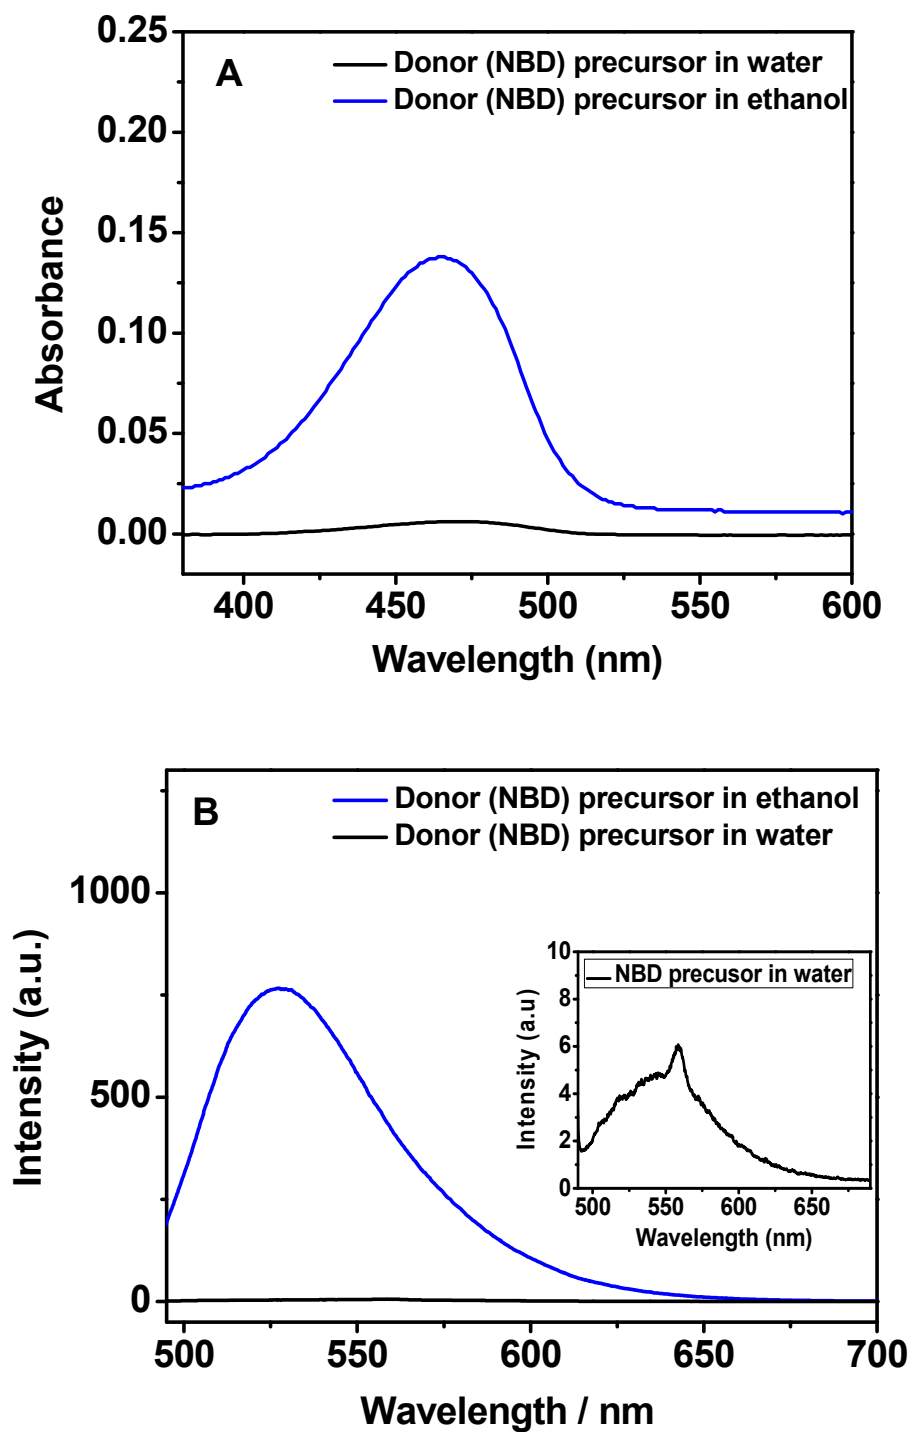

**Fig. S4.** Absorption (A) and fluorescence (excited at 430 nm) (B) spectra for NBD precursor in saturated water solution and in ethanol solution. Inset in B: enlargement for the fluorescence spectra of NBD precursor in saturated water solution.

## Calculation of Förster Critical Radius ( $R_0$ )<sup>1-2</sup>

### Calculation of the Förster radii ( $R_0$ )<sup>1-3</sup> and determination of experimental energy transfer efficiency

The Förster's distance or critical distance  $R_0$  is the characteristic distance, at which the efficiency of energy transfer is 50%. The magnitude of  $R_0$  is dependent on the spectral properties of the donor and the acceptor molecules. If the wavelength  $\lambda$  is expressed in nanometers, then  $J(\lambda)$  is in units of  $M^{-1}cm^{-1}nm^4$  and the Förster critical radius (distance),  $R_0$  in angstroms ( $\text{\AA}$ ), is expressed as follows [Eq. (1)]:

$$R_0 = 0.2108 \times [K^2 \times \Phi_D \times n^{-4} \times J(\lambda)]^{1/6} \quad [\text{Eq. (1)}]$$

$K^2$  is the orientation factor for the emission and absorption dipoles and its value depends on their relative orientation,  $n$  is the refractive index of the medium and  $\Phi_D$  is the quantum yield of the donor.  $J(\lambda)$  is the overlap integral of the fluorescence emission spectrum of the donor and the absorption spectrum of the acceptor [Eq. (2)].

$$J(\lambda) = \int_0^\infty F_D(\lambda) \times \varepsilon_A(\lambda) \times \lambda^4 \times d\lambda \quad [\text{Eq. (2)}]$$

$F_D(\lambda)$  is the fluorescence intensity of the donor in the absence of acceptor normalized so that  $\int_0^\infty F_D(\lambda) d\lambda = 1$ ;  $\varepsilon_A(\lambda)$  is molar extinction coefficient of the acceptor,  $\lambda$  is wavelength. In current experimental conditions, for the multilayered film system, the  $J(\lambda)$  was calculated to be  $3.89 \times 10^{15} M^{-1}cm^{-1}nm^4$ . The Förster critical radius ( $R_0$ ) has been calculated assuming random orientation of the donor and acceptor molecules taking  $K^2 = 2/3$ ,  $n = 1.54$  (silica), and determined  $\Phi_D = 0.82$ .

For NBD (donor) and SRhB/Hg<sup>2+</sup> (acceptor) in current experimental situation, by using a



commercial software Origin 8.0 as the integral tool, we calculated  $R_0 = 30.5 \text{ \AA}$ . Energy transfer will be effective for  $15.2 \text{ \AA} \leq d \leq 45.8 \text{ \AA}$  ( $R_0 \pm 50\% R_0$ ).

**Reference:**

(1) Gouanve, F.; Schuster, T.; Allard, E.; Meallet-Renault, R.; Larpent, C. *Adv. Funct. Mater.* **2007**, *17*, 2746-2756.

(2) Valeur, B. *Molecular Fluorescence: Principles and Applications*: Wiley-VCH: New York, **2002**.
